# Supplementary material
Source: Springer Nature journal article supplement (https://www.springermedizin.de/resource/supplementary/12967_2011_1006_MOESM2_ESM.pdf/9573562)

**A**

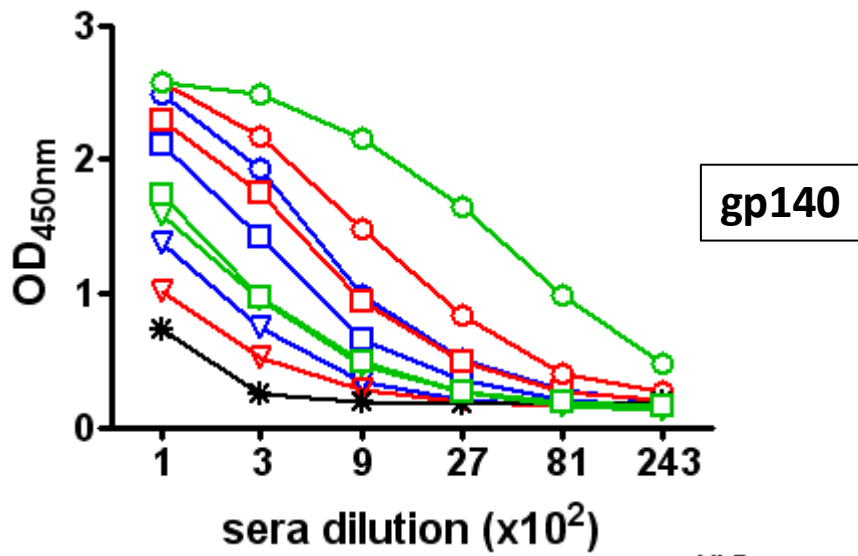

**B**

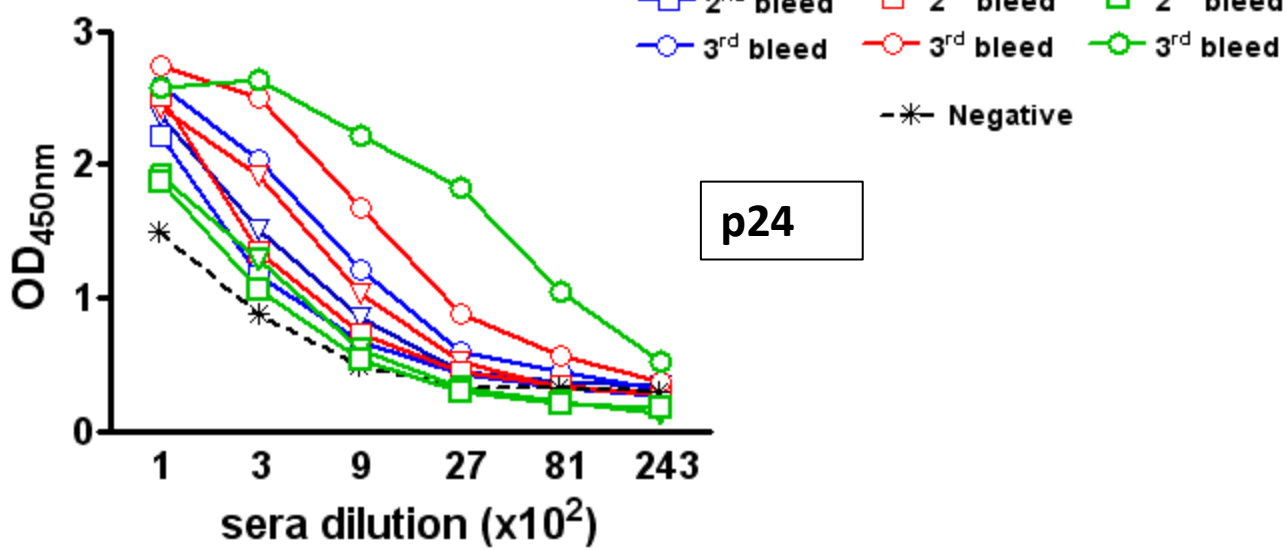

Supplement: MOESM2 [file 9573562]
